# Supplementary material for: Characteristics of Nephroblastoma/Nephroblastomatosis in Children with a Clinically Reported Underlying Malformation or Cancer Predisposition Syndrome
Source: MDPI journal article supplement (doi:10.3390/cancers13195016), 2021-10-07
Supplement: s1 [file s1]

# Supplementary Materials: Characteristics of Nephroblastoma/Nephroblastomatosis in Children with a Clinically Reported Underlying Malformation or Cancer Predisposition Syndrome

Nils Welter, Angelo Wagner, Rhoikos Furtwängler, Patrick Melchior, Leo Kager, Christian Vokuhl, Jens-Peter Schenk, Clemens Magnus Meier, Stefan Siemer, Manfred Gessler and Norbert Graf

**Table S1.** Further WT associated syndromes and malformations (number of involved patients in brackets). VSD: ventricular septal defect; ASD atrial septal defect

|                 |                                                                                                                                                                                                                                                                                                                                                                                              |                                                                                                                         |
|-----------------|----------------------------------------------------------------------------------------------------------------------------------------------------------------------------------------------------------------------------------------------------------------------------------------------------------------------------------------------------------------------------------------------|-------------------------------------------------------------------------------------------------------------------------|
| Other syndromes | Gigantism (4), Trisomy 21 (2), VACTERL (2), Perlman-syndrome (2), Neurofibromatosis type I (2), Townes-Brooks, Prader type III, Bloom-syndrome, Klinefelter syndrome, Gorlin-Goltz syndrome, Fanconi syndrome, Conradi-Hünermann syndrome, Rubinstein-Taybi syndrome, Oral-facial-digital syndrome, Mulibrey nanism, Trisomy 8, Trisomy 18, Trisomy 1, Crigler-Najjar syndrome, 11P syndrome |                                                                                                                         |
|                 | cardiac                                                                                                                                                                                                                                                                                                                                                                                      | VSD (4), ASD (2), Fallot, Pulmonary valve stenosis, PDA (3), other cardiac defects (2)                                  |
| Malformations   | renal                                                                                                                                                                                                                                                                                                                                                                                        | Horseshoe kidney (5)                                                                                                    |
|                 | facial                                                                                                                                                                                                                                                                                                                                                                                       | Auricular dysplasia (2), cleft lip and cleft palate (3), Microphthalmia, Anophthalmia, Iris coloboma, Hereditary ptosis |
|                 | visceral                                                                                                                                                                                                                                                                                                                                                                                     | anal atresia, omphalocele, lateral thyroglossal cyst, tracheal stenosis                                                 |
|                 | limb                                                                                                                                                                                                                                                                                                                                                                                         | syndactyly (2), hexadactyly, Amelia, pigeon toe, congenital hip malformation                                            |
|                 | cerebral                                                                                                                                                                                                                                                                                                                                                                                     | isolated cerebellar atrophy                                                                                             |
|                 | neoplastic                                                                                                                                                                                                                                                                                                                                                                                   | lipoma (3), lymphangioma, stromal granuloma                                                                             |

**Table S2.** Data on outcome of different patient groups. (NBL: Nephroblastomatosis); \*p<0,05. WT: Wilms tumor; CPS: cancer predisposition syndrome; NBL: nephroblastomatosis; GU: Genitourinary malformations; BWS: Beckwith-Wiedemann spectrum; IHH: isolated hemihypertrophy; DDS: Denys-Drash syndrome; WAGR: Wilms tumor, aniridia, genitourinary abnormalities, range of developmental delays.

|                | Event<br><i>n</i> | Last event<br>(months) | Death<br><i>n</i> | Last death<br>(months) | EFS<br>2y | EFS<br>5y | EFS<br>10y | OS<br>2y | OS<br>5y | OS<br>10y |
|----------------|-------------------|------------------------|-------------------|------------------------|-----------|-----------|------------|----------|----------|-----------|
| No syndrome    | 65                | 115                    | 54                | 143                    | 88,2      | 85,3      | 84,1       | 95,0     | 93,0     | 92,2      |
| With syndrome  | 16                | 83                     | 15                | 86                     | 87,1      | 84,2      | 83,2       | 96,3     | 92,0     | 88,1      |
| WAGR           | 2                 | 83                     | 2                 | 19                     | 87,5      | 87,5      | 77,8       | 88,4     | 88,4     | 88,4      |
| GU             | 7                 | 21                     | 7                 | 86                     | 87,6      | 87,6      | 87,6       | 96,9     | 92,0     | 88,3      |
| DDS            | 1                 | 5                      | 2                 | 6                      | 94,7      | 94,7      | 94,7       | 90,6     | 90,6     | 90,6      |
| BWS            | 8                 | 59                     | 3                 | 85                     | 83,0      | 60,6*     | 60,6*      | 100      | 95,5     | 80,4      |
| IHH            | 4                 | 22                     | 2                 | 40                     | 84,6      | 84,6      | 84,6       | 100      | 91,8     | 91,8      |
| WT without NBL | 62                | 111                    | 60                | 143                    | 87,7      | 85,6      | 84,6       | 94,9     | 92,8     | 91,7      |
| Isolated NBL   | 10                | 115                    | 0                 | -                      | 85,0      | 83,3      | 76,1       | 100      | 100      | 100       |
| WT with NBL    | 14                | 61                     | 4                 | 38                     | 80,5      | 71,8      | 69,1       | 94,7     | 92,4     | 92,4      |

**Table S3:** Frequencies of metastatic disease in patients with or without malformations or CPS. WT: Wilms tumor; CPS: cancer predisposition syndrome; NBL: nephroblastomatosis; GU: Genitourinary malformations; BWS: Beckwith-Wiedemann spectrum; IHH: isolated hemihypertrophy; DDS: Denys-Drash syndrome; WAGR: Wilms tumor, aniridia, genitourinary abnormalities, range of developmental delays

|                                                     | Metastasis at diagnosis |       | Non-metastatic disease |       | Total |      |
|-----------------------------------------------------|-------------------------|-------|------------------------|-------|-------|------|
| <b>WT/NBL<br/>without<br/>CPS/malformati<br/>on</b> | 515                     | 18.7% | 2241                   | 81.3% | 2756  | 100% |
| <b>WAGR</b>                                         | 1                       | 5.0%  | 19                     | 95.0% | 20    | 100% |
| <b>GU</b>                                           | 5                       | 7.6%  | 61                     | 92.4% | 66    | 100% |
| <b>DDS</b>                                          | 1                       | 4.2%  | 23                     | 95.8% | 24    | 100% |
| <b>BWS</b>                                          | 2                       | 6.3%  | 30                     | 93.8% | 32    | 100% |
| <b>IHH</b>                                          | 5                       | 17.2% | 24                     | 82.8% | 29    | 100% |
